# Supplementary material for: Prevention of Coronavirus Disease 2019 Among Older Adults Receiving Pneumococcal Conjugate Vaccine Suggests Interactions Between Streptococcus pneumoniae and Severe Acute Respiratory Syndrome Coronavirus 2 in the Respiratory Tract
Source: Oxford University Press journal article supplement (doi:10.1093/infdis/jiab128), 2021-03-04
Supplement: jiab128_suppl_supplementary_material.pdf [file jiab128_suppl_supplementary_material.pdf]

**Table S1: Incidence of COVID-19 outcomes in the cohort, by demographic and clinical attributes.**

| Attribute           |                                         | Total<br><i>N</i> | Frequency of COVID-19 outcomes      |                   |                                        |                   |                                              |                   |      |
|---------------------|-----------------------------------------|-------------------|-------------------------------------|-------------------|----------------------------------------|-------------------|----------------------------------------------|-------------------|------|
|                     |                                         |                   | Any COVID-19 diagnosis <sup>1</sup> |                   | COVID-19 hospitalizations <sup>1</sup> |                   | Fatal COVID-19 hospitalizations <sup>1</sup> |                   |      |
|                     |                                         |                   | <i>N</i>                            | Inc. <sup>2</sup> | <i>N</i>                               | Inc. <sup>2</sup> | <i>N</i>                                     | Inc. <sup>2</sup> |      |
| Age on 1 March 2020 |                                         |                   |                                     |                   |                                        |                   |                                              |                   |      |
|                     | 65-69 years                             | 139,336           | 1,033                               | 198.4             | 160                                    | 30.7              | 25                                           | 4.8               |      |
|                     | 70-74 years                             | 155,424           | 919                                 | 158.0             | 210                                    | 36.1              | 46                                           | 7.9               |      |
|                     | 75-79 years                             | 103,626           | 629                                 | 162.2             | 206                                    | 53.1              | 71                                           | 18.3              |      |
|                     | 80-84 years                             | 68,643            | 477                                 | 185.8             | 204                                    | 79.3              | 67                                           | 26.0              |      |
|                     | 85-89 years                             | 41,015            | 359                                 | 234.2             | 172                                    | 112.0             | 72                                           | 46.8              |      |
|                     | ≥90 years                               | 22,989            | 260                                 | 302.9             | 123                                    | 143.0             | 53                                           | 61.5              |      |
| Sex                 |                                         |                   |                                     |                   |                                        |                   |                                              |                   |      |
|                     | Female                                  | 294,352           | 1,955                               | 177.6             | 502                                    | 45.5              | 136                                          | 12.3              |      |
|                     | Male                                    | 236,681           | 1,722                               | 194.6             | 573                                    | 64.7              | 198                                          | 22.3              |      |
| Race and ethnicity  |                                         |                   |                                     |                   |                                        |                   |                                              |                   |      |
|                     | White, non-Hispanic                     | 259,428           | 1,216                               | 125.2             | 386                                    | 39.7              | 133                                          | 13.7              |      |
|                     | Black, non-Hispanic                     | 49,822            | 364                                 | 195.5             | 140                                    | 75.1              | 44                                           | 23.6              |      |
|                     | Asian or Pacific Islander, non-Hispanic | 62,865            | 320                                 | 136.1             | 98                                     | 41.6              | 25                                           | 10.6              |      |
|                     | Hispanic (any race)                     | 140,049           | 1,709                               | 326.8             | 439                                    | 83.7              | 130                                          | 24.8              |      |
|                     | Other, mixed, or unknown race           | 18,869            | 68                                  | 96.2              | 12                                     | 17.0              | 2                                            | 2.8               |      |
| Tobacco smoking     |                                         |                   |                                     |                   |                                        |                   |                                              |                   |      |
|                     | Current smoker                          | 17,007            | 86                                  | 135.1             | 31                                     | 48.7              | 8                                            | 12.6              |      |
|                     | Former smoker                           | 172,170           | 1,292                               | 200.7             | 475                                    | 73.7              | 167                                          | 25.9              |      |
|                     | Never smoker                            | 299,120           | 2,182                               | 195.1             | 554                                    | 49.5              | 154                                          | 13.7              |      |
|                     | Unknown                                 | 42,736            | 117                                 | 73.1              | 15                                     | 9.4               | 5                                            | 3.1               |      |
| Body mass index     |                                         |                   |                                     |                   |                                        |                   |                                              |                   |      |
|                     | <18.5 (underweight)                     | 9,355             | 62                                  | 177.2             | 29                                     | 82.8              | 12                                           | 34.2              |      |
|                     | 18.5-24.9 (normal weight)               | 146,062           | 868                                 | 158.9             | 303                                    | 55.4              | 109                                          | 19.9              |      |
|                     | 25.0-29.9 (overweight)                  | 182,056           | 1,313                               | 192.9             | 361                                    | 52.9              | 105                                          | 15.4              |      |
|                     | 30.0-39.9 (obese)                       | 128,836           | 1,059                               | 219.9             | 276                                    | 57.2              | 86                                           | 17.8              |      |
|                     | ≥40.0 (morbidly obese)                  | 15,721            | 152                                 | 258.7             | 39                                     | 66.2              | 9                                            | 15.3              |      |
|                     | Unknown                                 | 49,003            | 223                                 | 121.6             | 67                                     | 36.5              | 13                                           | 7.1               |      |
| Comorbid conditions |                                         |                   |                                     |                   |                                        |                   |                                              |                   |      |
|                     | Myocardial infarction                   |                   |                                     |                   |                                        |                   |                                              |                   |      |
|                     |                                         | Yes               | 24,223                              | 265               | 293.0                                  | 121               | 133.5                                        | 50                | 55.1 |
|                     |                                         | No                | 506,810                             | 3,412             | 180.0                                  | 954               | 50.3                                         | 284               | 15.0 |
|                     | Congestive heart failure                |                   |                                     |                   |                                        |                   |                                              |                   |      |
|                     |                                         | Yes               | 37,583                              | 476               | 339.5                                  | 222               | 158.0                                        | 87                | 61.8 |
|                     |                                         | No                | 493,450                             | 3,201             | 173.4                                  | 853               | 46.2                                         | 247               | 13.4 |
|                     | Peripheral vascular disease             |                   |                                     |                   |                                        |                   |                                              |                   |      |
|                     |                                         | Yes               | 192,733                             | 1,646             | 228.5                                  | 624               | 86.5                                         | 223               | 30.9 |
|                     |                                         | No                | 338,300                             | 2,031             | 160.5                                  | 451               | 35.6                                         | 111               | 8.8  |
|                     | Cerebrovascular disease                 |                   |                                     |                   |                                        |                   |                                              |                   |      |
|                     |                                         | Yes               | 33,232                              | 407               | 328.3                                  | 189               | 152.1                                        | 76                | 61.0 |
|                     |                                         | No                | 497,801                             | 3,270             | 175.6                                  | 886               | 47.5                                         | 258               | 13.8 |
|                     | Hypertension                            |                   |                                     |                   |                                        |                   |                                              |                   |      |
|                     |                                         | Yes               | 319,740                             | 2,554             | 213.7                                  | 838               | 70.0                                         | 278               | 23.2 |
|                     |                                         | No                | 211,293                             | 1,123             | 142.1                                  | 237               | 29.9                                         | 56                | 7.1  |
|                     | Hyperlipidemia                          |                   |                                     |                   |                                        |                   |                                              |                   |      |

|                                       |                                               |         |       |       |       |       |     |       |
|---------------------------------------|-----------------------------------------------|---------|-------|-------|-------|-------|-----|-------|
|                                       | Yes                                           | 348,420 | 2,590 | 198.8 | 797   | 61.1  | 263 | 20.1  |
|                                       | No                                            | 182,613 | 1,087 | 159.1 | 278   | 40.6  | 71  | 10.4  |
| Diabetes                              |                                               |         |       |       |       |       |     |       |
|                                       | Yes                                           | 137,582 | 1,392 | 270.8 | 488   | 94.8  | 159 | 30.8  |
|                                       | No                                            | 393,451 | 2,285 | 155.2 | 587   | 39.8  | 175 | 11.9  |
| Chronic obstructive pulmonary disease |                                               |         |       |       |       |       |     |       |
|                                       | Yes                                           | 86,098  | 786   | 244.2 | 266   | 82.5  | 86  | 26.7  |
|                                       | No                                            | 444,935 | 2,891 | 173.7 | 809   | 48.5  | 248 | 14.9  |
| Renal disease                         |                                               |         |       |       |       |       |     |       |
|                                       | Yes                                           | 96,735  | 879   | 243.1 | 387   | 106.9 | 142 | 39.2  |
|                                       | No                                            | 434,298 | 2,798 | 172.2 | 688   | 42.3  | 192 | 11.8  |
| Moderate or severe liver disease      |                                               |         |       |       |       |       |     |       |
|                                       | Yes                                           | 1,774   | 22    | 332.4 | 11    | 165.9 | 2   | 30.1  |
|                                       | No                                            | 529,259 | 3,655 | 184.7 | 1,064 | 53.7  | 332 | 16.7  |
| Malignancy                            |                                               |         |       |       |       |       |     |       |
|                                       | Yes                                           | 29,187  | 197   | 180.5 | 73    | 66.8  | 23  | 21.0  |
|                                       | No                                            | 501,846 | 3,480 | 185.5 | 1,002 | 53.3  | 311 | 16.5  |
| Metastatic solid tumor                |                                               |         |       |       |       |       |     |       |
|                                       | Yes                                           | 8,968   | 56    | 167.1 | 25    | 74.5  | 8   | 23.8  |
|                                       | No                                            | 522,065 | 3,621 | 185.5 | 1,050 | 53.7  | 326 | 16.7  |
| Asthma                                |                                               |         |       |       |       |       |     |       |
|                                       | Yes                                           | 48,338  | 425   | 235.2 | 122   | 67.4  | 38  | 21.0  |
|                                       | No                                            | 482,695 | 3,252 | 180.1 | 953   | 52.7  | 296 | 16.4  |
| Obstructive sleep apnea               |                                               |         |       |       |       |       |     |       |
|                                       | Yes                                           | 33,709  | 266   | 211.1 | 86    | 68.1  | 28  | 22.2  |
|                                       | No                                            | 497,324 | 3,411 | 183.4 | 989   | 53.1  | 306 | 16.4  |
| HIV/AIDS                              |                                               |         |       |       |       |       |     |       |
|                                       | Yes                                           | 181     | 2     | 295.9 | 0     | 0.0   | 0   | 0.0   |
|                                       | No                                            | 530,852 | 3,675 | 185.1 | 1,075 | 54.1  | 334 | 16.8  |
| Organ transplant                      |                                               |         |       |       |       |       |     |       |
|                                       | Yes                                           | 588     | 4     | 181.9 | 3     | 136.4 | 3   | 136.3 |
|                                       | No                                            | 530,445 | 3,673 | 185.2 | 1,072 | 54    | 331 | 16.6  |
| Other immunocompromising condition    |                                               |         |       |       |       |       |     |       |
|                                       | Yes                                           | 23,922  | 271   | 303.6 | 124   | 138.6 | 50  | 55.8  |
|                                       | No                                            | 507,111 | 3,406 | 179.6 | 951   | 50.1  | 284 | 14.9  |
| Hypothyroidism                        |                                               |         |       |       |       |       |     |       |
|                                       | Yes                                           | 72,325  | 523   | 193.4 | 166   | 61.3  | 55  | 20.3  |
|                                       | No                                            | 458,708 | 3,154 | 183.9 | 909   | 52.9  | 279 | 16.2  |
| Rheumatologic/inflammatory condition  |                                               |         |       |       |       |       |     |       |
|                                       | Yes                                           | 12,534  | 104   | 222.0 | 43    | 91.7  | 11  | 23.4  |
|                                       | No                                            | 518,499 | 3,573 | 184.3 | 1,032 | 53.1  | 323 | 16.6  |
| Depression                            |                                               |         |       |       |       |       |     |       |
|                                       | Yes                                           | 70,823  | 720   | 272.1 | 244   | 92    | 89  | 33.5  |
|                                       | No                                            | 460,210 | 2,957 | 171.8 | 831   | 48.2  | 245 | 14.2  |
| Zoster vaccination                    |                                               |         |       |       |       |       |     |       |
|                                       | Any zoster vaccine dose received <sup>3</sup> | 233,780 | 1,282 | 146.5 | 356   | 40.6  | 113 | 12.9  |
|                                       | No zoster vaccine dose received               | 297,253 | 2,395 | 215.5 | 719   | 64.6  | 221 | 19.8  |
| Influenza vaccination                 |                                               |         |       |       |       |       |     |       |
|                                       | Received in 2019-20 season                    | 410,428 | 2,963 | 193.1 | 898   | 58.4  | 284 | 18.5  |
|                                       | Not received in 2019-20 season                | 120,605 | 714   | 158.2 | 177   | 39.2  | 50  | 11.1  |

|                                      |                                        |              |         |       |       |       |      |       |
|--------------------------------------|----------------------------------------|--------------|---------|-------|-------|-------|------|-------|
| PPSV23 vaccination <sup>4</sup>      | PPSV23 received                        | 418,309      | 2,969   | 190.3 | 934   | 59.8  | 303  | 19.4  |
|                                      | PPSV23 not received                    | 116,558      | 708     | 166.3 | 141   | 33.1  | 31   | 7.3   |
| PCV13 vaccination <sup>4</sup>       | PCV13 received                         | 451,068      | 3,212   | 190.5 | 984   | 58.3  | 311  | 18.4  |
|                                      | PCV13 not received                     | 80,600       | 465     | 155.3 | 91    | 30.3  | 23   | 7.7   |
| Prior year outpatient visits         | 0-9                                    | 141,306      | 846     | 160.1 | 202   | 38.2  | 57   | 10.8  |
|                                      | 10-19                                  | 156,375      | 984     | 168.2 | 247   | 42.2  | 73   | 12.5  |
|                                      | 20-29                                  | 98,247       | 706     | 192.1 | 207   | 56.3  | 69   | 18.7  |
|                                      | 30-39                                  | 56,007       | 425     | 202.9 | 134   | 63.9  | 43   | 20.5  |
|                                      | ≥40                                    | 79,098       | 716     | 242.3 | 285   | 96.3  | 92   | 31.0  |
| Prior year inpatient visits          | 0                                      | 488,987      | 3,150   | 172.2 | 831   | 45.4  | 253  | 13.8  |
|                                      | 1                                      | 32,489       | 359     | 296.0 | 151   | 124.3 | 39   | 32.0  |
|                                      | 2                                      | 6,538        | 102     | 418.9 | 57    | 233.5 | 24   | 98.1  |
|                                      | ≥3                                     | 3,019        | 66      | 589.0 | 36    | 320.2 | 18   | 159.5 |
|                                      | Prior year emergency department visits | 0            | 408,102 | 2,389 | 156.5 | 567   | 37.1 | 173   |
| 1                                    |                                        | 78,391       | 699     | 238.6 | 239   | 81.4  | 64   | 21.8  |
| 2                                    |                                        | 24,833       | 290     | 312.8 | 113   | 121.6 | 40   | 43.0  |
| ≥3                                   |                                        | 19,707       | 299     | 407.2 | 156   | 211.9 | 57   | 77.2  |
| Census tract median household income |                                        | \$0-\$29,999 | 6,627   | 87    | 351.8 | 24    | 96.7 | 2     |
|                                      | \$30,000-\$49,999                      | 79,942       | 801     | 268.2 | 246   | 82.2  | 78   | 26.0  |
|                                      | \$50,000-\$69,999                      | 118,754      | 984     | 221.7 | 280   | 63.0  | 87   | 19.5  |
|                                      | \$70,000-\$89,999                      | 123,836      | 835     | 180.3 | 220   | 47.4  | 68   | 14.7  |
|                                      | \$90,000-\$109,999                     | 91,183       | 489     | 143.3 | 144   | 42.2  | 42   | 12.3  |
|                                      | \$110,000-\$129,999                    | 61,126       | 281     | 122.8 | 93    | 40.6  | 37   | 16.1  |
|                                      | ≥\$130,000                             | 48,549       | 193     | 106.2 | 63    | 34.6  | 20   | 11.0  |
|                                      | Unknown                                | 1,016        | 7       | 184.5 | 5     | 131.7 | 0    | 0.0   |

<sup>1</sup>We define any COVID-19 diagnosis as a positive result of a molecular test for SARS-CoV-2 infection or a clinically confirmed COVID-19 diagnosis, a COVID-19 hospitalization as a new inpatient admission (excluding observational admissions lasting <24 hours) between 7 days before and 28 days after a COVID-19 diagnosis, and fatal COVID-19 hospitalization as death ≥60 days of admission.

<sup>2</sup>Incidence per 10,000 person-years at risk.

<sup>3</sup>Receipt of ≥1 dose of live or recombinant zoster vaccine.

<sup>4</sup>Values may not sum to the total number of individuals enrolled, as time within each exposure group is included for individuals who received PCV13 or PPSV23 during the study period.

**Table S2: Descriptive attributes of the cohort before and after reweighting by inverse propensity of receipt of PCV13.**

| Attribute                    | Proportion, unweighted (weighted)             |                    |             |
|------------------------------|-----------------------------------------------|--------------------|-------------|
|                              | PCV13 received                                | PCV13 not received |             |
| Age on 1 March 2020          |                                               |                    |             |
|                              | 65-69 years                                   | 21.5 (26.7)        | 53.2 (31.9) |
|                              | 70-74 years                                   | 30.3 (29.1)        | 23.6 (29.8) |
|                              | 75-79 years                                   | 20.9 (19.4)        | 11.8 (17.8) |
|                              | 80-84 years                                   | 14.1 (12.8)        | 6.2 (10.1)  |
|                              | 85-89 years                                   | 8.5 (7.7)          | 3.2 (6.4)   |
|                              | ≥90 years                                     | 4.7 (4.3)          | 2.0 (3.9)   |
| Sex                          |                                               |                    |             |
|                              | Female                                        | 55.4 (55.4)        | 55.4 (56.6) |
|                              | Male                                          | 44.6 (44.6)        | 44.6 (43.4) |
| Race and ethnicity           |                                               |                    |             |
|                              | White, non-Hispanic                           | 49.2 (48.8)        | 46.7 (46.2) |
|                              | Black, non-Hispanic                           | 8.8 (9.4)          | 12.9 (9.0)  |
|                              | Asian/Pacific Islander, non-Hispanic          | 12.5 (11.9)        | 8.2 (11.8)  |
|                              | Hispanic (any race)                           | 27.2 (26.8)        | 21.9 (29.3) |
|                              | Other, mixed, or unknown race                 | 2.4 (3.1)          | 10.3 (3.8)  |
| Tobacco smoking              |                                               |                    |             |
|                              | Current smoker                                | 3.1 (3.2)          | 3.7 (3.7)   |
|                              | Former smoker                                 | 34.6 (32.1)        | 20.1 (29.2) |
|                              | Never smoker                                  | 57.9 (56.1)        | 47.6 (57.0) |
|                              | Unknown                                       | 4.4 (8.5)          | 28.6 (10.2) |
| Body mass index              |                                               |                    |             |
|                              | <18.5 (underweight)                           | 1.8 (1.8)          | 1.4 (2.0)   |
|                              | 18.5-24.9 (normal weight)                     | 28.7 (27.2)        | 20.7 (26.1) |
|                              | 25.0-29.9 (overweight)                        | 35.9 (34.0)        | 25.1 (33.5) |
|                              | 30.0-39.9 (obese)                             | 25.4 (24.1)        | 18.0 (23.6) |
|                              | ≥40.0 (morbidly obese)                        | 3.1 (2.9)          | 2.4 (2.8)   |
|                              | Unknown                                       | 5.1 (10.0)         | 32.4 (11.9) |
| Comorbid conditions          |                                               |                    |             |
|                              | Myocardial infarction                         | 5.0 (4.5)          | 2.1 (4.3)   |
|                              | Congestive heart failure                      | 7.9 (7.0)          | 2.5 (6.7)   |
|                              | Peripheral vascular disease                   | 40.3 (35.8)        | 13.8 (31.3) |
|                              | Cerebrovascular disease                       | 6.9 (6.2)          | 2.8 (6.1)   |
|                              | Hypertension                                  | 64.7 (59.7)        | 35.1 (57.1) |
|                              | Hyperlipidemia                                | 70.5 (64.9)        | 38.2 (60.8) |
|                              | Diabetes                                      | 28.4 (25.7)        | 12.1 (24.4) |
|                              | Chronic obstructive pulmonary disease         | 17.9 (16.0)        | 6.8 (14.4)  |
|                              | Renal disease                                 | 20.2 (17.9)        | 6.9 (15.5)  |
|                              | Moderate or severe liver disease              | 0.4 (0.3)          | 0.1 (0.5)   |
|                              | Malignancy                                    | 6.0 (5.4)          | 3.0 (5.1)   |
|                              | Metastatic solid tumor                        | 1.8 (1.7)          | 1.0 (1.5)   |
|                              | Asthma                                        | 10.0 (9.0)         | 4.0 (8.2)   |
|                              | Obstructive sleep apnea                       | 7.0 (6.3)          | 2.8 (5.8)   |
|                              | HIV/AIDS                                      | <0.1 (<0.1)        | <0.1 (<0.1) |
|                              | Organ transplant                              | 0.1 (0.1)          | <0.1 (0.2)  |
|                              | Other immunocompromising condition            | 4.9 (4.5)          | 2.3 (4.7)   |
|                              | Hypothyroidism                                | 14.7 (13.5)        | 7.7 (13.0)  |
|                              | Rheumatologic/inflammatory condition          | 2.6 (2.3)          | 1.2 (2.3)   |
|                              | Depression                                    | 14.6 (13.2)        | 6.0 (12.9)  |
| Zoster vaccination           |                                               |                    |             |
|                              | Any zoster vaccine dose received <sup>2</sup> | 49.7 (43.7)        | 11.9 (40.9) |
| Influenza vaccination        |                                               |                    |             |
|                              | Vaccinated in 2019-20 season                  | 86.5 (76.7)        | 25.6 (73.0) |
| PPSV23 vaccination           |                                               |                    |             |
|                              | PPSV23 ever received                          | 89.7 (77.5)        | 17.1 (74.3) |
| Prior year outpatient visits |                                               |                    |             |
|                              | 0-9                                           | 21.7 (27.4)        | 54.0 (31.1) |
|                              | 10-19                                         | 30.4 (29.3)        | 23.8 (29.6) |
|                              | 20-29                                         | 19.8 (18.3)        | 11.0 (16.8) |
|                              | 30-39                                         | 11.5 (10.4)        | 5.3 (9.2)   |
|                              | ≥40                                           | 16.5 (14.7)        | 6.0 (13.3)  |
| Prior year inpatient visits  |                                               |                    |             |
|                              | 0                                             | 91.3 (92.2)        | 96.4 (91.8) |
|                              | 1                                             | 6.7 (6.1)          | 3.0 (6.2)   |
|                              | 2                                             | 1.4 (1.2)          | 0.4 (1.4)   |

|                                        |                     |             |             |
|----------------------------------------|---------------------|-------------|-------------|
| Prior year emergency department visits | ≥3                  | 0.6 (0.6)   | 0.2 (0.7)   |
|                                        | 0                   | 75.2 (77.0) | 86.2 (78.2) |
|                                        | 1                   | 15.6 (14.6) | 9.9 (14.1)  |
|                                        | 2                   | 5.1 (4.6)   | 2.4 (4.3)   |
|                                        | ≥3                  | 4.1 (3.7)   | 1.5 (3.5)   |
| Census tract median household income   |                     |             |             |
|                                        | \$0-\$29,999        | 1.2 (1.2)   | 1.5 (1.4)   |
|                                        | \$30,000-\$49,999   | 14.9 (15.1) | 15.9 (16.2) |
|                                        | \$50,000-\$69,999   | 22.3 (22.5) | 22.9 (22.9) |
|                                        | \$70,000-\$89,999   | 23.4 (23.3) | 23.0 (23.4) |
|                                        | \$90,000-\$109,999  | 17.2 (17.2) | 17.0 (16.9) |
|                                        | \$110,000-\$129,999 | 11.7 (11.4) | 10.6 (10.8) |
|                                        | ≥\$130,000          | 9.2 (9.1)   | 8.6 (8.4)   |
|                                        | Unknown             | 0.1 (0.2)   | 0.4 (0.2)   |

ACIP: Advisory Committee on Immunization Practices; PCV13: 13-valent pneumococcal conjugate vaccine; PPSV23: 23-valent pneumococcal polysaccharide vaccine.

Values in the table show the proportion of individuals within each exposure group who exhibit the indicated factor, before and after IPW weighting.

<sup>1</sup>Receipt of PCV13 ≥1 year before PPSV23 for immunocompetent individuals, or ≥8 weeks before PPSV23 for immunocompromised individuals, or (for individuals who had previously received PPSV23) receipt of PCV13 ≥1 year after the most recent PPSV23 dose.

<sup>2</sup>Receipt of ≥1 dose of live or recombinant zoster vaccine.

**Table S3: Effectiveness of receipt of PCV13 against COVID-19 outcomes.**

| Exposure                                                                                 | Effect measure                                            | Endpoint                                  |                                             |                                                   |
|------------------------------------------------------------------------------------------|-----------------------------------------------------------|-------------------------------------------|---------------------------------------------|---------------------------------------------------|
|                                                                                          |                                                           | <u>Any COVID-19 diagnosis<sup>1</sup></u> | <u>COVID-19 hospitalization<sup>1</sup></u> | <u>Fatal COVID-19 hospitalization<sup>1</sup></u> |
| PCV13 vs. no receipt of PCV13 (without negative control)                                 | Adjusted hazard ratio (95% CI)                            | 0.55 (0.51, 0.59)                         | 0.54 (0.47, 0.62)                           | 0.46 (0.36, 0.57)                                 |
| PCV13 vs. no receipt of PCV13 (any zoster vaccine dose as negative control) <sup>2</sup> | Negative control corrected adjusted hazard ratio (95% CI) | 0.65 (0.59, 0.72)                         | 0.68 (0.57, 0.83)                           | 0.68 (0.49, 0.95)                                 |

COVID-19: coronavirus disease 2019; PCV13: 13-valent pneumococcal conjugate vaccine.

We obtain estimates presented in the table via Cox proportional hazards models; adjusted estimates are obtained from doubly robust inverse propensity weighted models that include covariates presented in **Table 1**. We indicate reweighted sample characteristics in **Table S2**. In analyses using zoster vaccine receipt as negative control exposures, we define the null effect size as the adjusted hazard ratio of each outcome associated with receipt of any zoster vaccine dose, as presented in **Table S6**.

<sup>1</sup>We define any COVID-19 diagnosis as a positive result of a molecular test for SARS-CoV-2 infection or a clinically confirmed COVID-19 diagnosis, COVID-19 hospitalization as a new inpatient admission (excluding observational admissions lasting <24 hours) between 7 days before and 28 days after a COVID-19 diagnosis, and fatal COVID-19 hospitalization as death ≤60 days following admission.

<sup>2</sup>Receipt of ≥1 dose of live or recombinant zoster vaccine.

**Table S4: Effectiveness of receipt of both PCV13 and PPSV23 against COVID-19 outcomes.**

| Exposure                                                                                                                           | Effect measure                                            | Endpoint                            |                                       |                                             |
|------------------------------------------------------------------------------------------------------------------------------------|-----------------------------------------------------------|-------------------------------------|---------------------------------------|---------------------------------------------|
|                                                                                                                                    |                                                           | Any COVID-19 diagnosis <sup>1</sup> | COVID-19 hospitalization <sup>1</sup> | Fatal COVID-19 hospitalization <sup>1</sup> |
| PCV13 and PPSV23 per 2015 ACIP guidelines vs. no pneumococcal vaccine (without negative control) <sup>2</sup>                      | Adjusted hazard ratio (95% CI)                            | 0.56 (0.49, 0.63)                   | 0.43 (0.33, 0.55)                     | 0.39 (0.24, 0.61)                           |
| PCV13 and PPSV23 per 2015 ACIP guidelines vs. no pneumococcal vaccine (any zoster vaccine dose as negative control) <sup>2,3</sup> | Negative control corrected adjusted hazard ratio (95% CI) | 0.66 (0.56, 0.76)                   | 0.54 (0.41, 0.73)                     | 0.57 (0.33, 0.97)                           |

ACIP: Advisory Committee on Immunization Practices; COVID-19: coronavirus disease 2019; PCV13: 13-valent pneumococcal conjugate vaccine; PPSV23: 23-valent pneumococcal polysaccharide vaccine.

We obtain estimates presented in the table via Cox proportional hazards models; adjusted estimates are obtained from doubly robust inverse propensity weighted models that include covariates presented in **Table 1**. We indicate reweighted sample characteristics in **Table S2**. In analyses using zoster vaccine receipt as negative control exposures, we define the null effect size as the adjusted hazard ratio of each outcome associated with receipt of any zoster vaccine dose, as presented in **Table S6**.

<sup>1</sup>We define any COVID-19 diagnosis as a positive result of a molecular test for SARS-CoV-2 infection or a clinically confirmed COVID-19 diagnosis, COVID-19 hospitalization as a new inpatient admission (excluding observational admissions lasting <24 hours) between 7 days before and 28 days after a COVID-19 diagnosis, and fatal COVID-19 hospitalization as death ≤60 days following admission.

<sup>2</sup>Receipt of PCV13 ≥1 year before PPSV23 for immunocompetent individuals, or ≥8 weeks before PPSV23 for immunocompromised individuals, or (for individuals who had previously received PPSV23) receipt of PCV13 ≥1 year after the most recent PPSV23 dose. Individuals receiving sequences incompatible with these intervals are excluded from analyses.

<sup>3</sup>Receipt of ≥1 dose of live or recombinant zoster vaccine.

**Table S5: Estimates of PPSV23 effectiveness against COVID-19 outcomes, and relative effectiveness of PCV13 alone versus PPSV23 alone.**

| Exposure                                                                                   | Effect measure                                            | Any COVID-19 diagnosis <sup>1</sup> | Endpoint COVID-19 hospitalization <sup>1</sup> | Fatal COVID-19 hospitalization <sup>1</sup> |
|--------------------------------------------------------------------------------------------|-----------------------------------------------------------|-------------------------------------|------------------------------------------------|---------------------------------------------|
|                                                                                            |                                                           |                                     |                                                |                                             |
| PPSV23 vs. no receipt of PPSV23 (without negative control)                                 | Adjusted hazard ratio (95% CI)                            | 1.01 (0.91, 1.12)                   | 0.80 (0.65, 0.98)                              | 0.85 (0.56, 1.24)                           |
|                                                                                            | Negative control corrected adjusted hazard ratio (95% CI) | 1.19 (1.05, 1.36)                   | 1.02 (0.78, 1.29)                              | 1.28 (0.77, 2.01)                           |
| PPSV23 vs. no receipt of PPSV23 (any zoster vaccine dose as negative control) <sup>2</sup> | Adjusted hazard ratio (95% CI) <sup>3</sup>               | 0.55 (0.48, 0.62)                   | 0.68 (0.53, 0.87)                              | 0.56 (0.35, 0.87)                           |
|                                                                                            |                                                           |                                     |                                                |                                             |
| PCV13 only versus PPSV23 only <sup>3</sup>                                                 |                                                           |                                     |                                                |                                             |

COVID-19: coronavirus disease 2019; PCV13: 13-valent pneumococcal conjugate vaccine; PPSV23: 23-valent pneumococcal polysaccharide vaccine.

We obtain estimates presented in the table via Cox proportional hazards models; adjusted estimates are obtained from doubly robust inverse propensity weighted (IPW) models that include covariates presented in **Table 1**. We indicate reweighted sample characteristics in **Table S3**. In analyses using zoster vaccine receipt as negative control exposures, we define the null effect size as the adjusted hazard ratio of each outcome associated with receipt of any zoster vaccine dose, as presented in **Table S6**.

<sup>1</sup>We define any COVID-19 diagnosis as a positive result of a molecular test for SARS-CoV-2 infection or a clinically confirmed COVID-19 diagnosis, COVID-19 hospitalization as a new inpatient admission (excluding observational admissions lasting <24 hours) between 7 days before and 28 days after a COVID-19 diagnosis, and fatal COVID-19 hospitalization as death ≤60 days following admission.

<sup>2</sup>Receipt of ≥1 dose of live or recombinant zoster vaccine.

<sup>3</sup>Analyses do not include negative control exposures, as both groups received pneumococcal vaccines. Negative control corrected aHR measures are equivalent to aHR measures due to cancellation of the negative control term in the denominators.



**Table S6: Negative control association of zoster vaccination with COVID-19 outcomes, in models fitted with inverse propensity weighting for PCV13 receipt.**

| Effect measure                   | Endpoint                            |                                       |                                             |
|----------------------------------|-------------------------------------|---------------------------------------|---------------------------------------------|
|                                  | Any COVID-19 diagnosis <sup>1</sup> | COVID-19 hospitalization <sup>1</sup> | Fatal COVID-19 hospitalization <sup>1</sup> |
| Unadjusted hazard ratio (95% CI) | 0.68 (0.63, 0.73)                   | 0.63 (0.55, 0.71)                     | 0.65 (0.52, 0.81)                           |
| Adjusted hazard ratio (95% CI)   | 0.86 (0.81, 0.93)                   | 0.75 (0.66, 0.86)                     | 0.72 (0.58, 0.90)                           |

ACIP: Advisory Committee on Immunization Practices; COVID-19: coronavirus disease 2019.

We obtain estimates presented in the table via Cox proportional hazards models; adjusted estimates are obtained from doubly robust inverse propensity weighted models that include covariates presented in **Table 1**. We define the exposure of zoster vaccination as receipt of  $\geq 1$  dose of live or recombinant zoster vaccine. We indicate reweighted sample characteristics in **Table S2**. We indicate the distribution of each covariate in association with zoster vaccine receipt in **Table S7**. We present estimates of the association of zoster and 2019-2020 seasonal influenza vaccination with COVID-19 outcomes in **Table S8**, based on analyses that include inverse propensity weighting for these exposures.

<sup>1</sup>We define any COVID-19 diagnosis as a positive result of a molecular test for SARS-CoV-2 infection or a clinically confirmed COVID-19 diagnosis, COVID-19 hospitalization as a new inpatient admission (excluding observational admissions lasting <24 hours) between 7 days before and 28 days after a COVID-19 diagnosis, and fatal COVID-19 hospitalization as death  $\leq 60$  days following admission.

**Table S7: Descriptive attributes of the cohort before and after reweighting by inverse propensity of receipt of zoster vaccines and 2019-2020 seasonal influenza vaccines.**

| Attribute                                     | Proportion, unweighted (weighted), %          |                                 |                                          |              |
|-----------------------------------------------|-----------------------------------------------|---------------------------------|------------------------------------------|--------------|
|                                               | Zoster vaccination                            |                                 | 2019-2020 seasonal influenza vaccination |              |
|                                               | Any zoster vaccine dose received <sup>1</sup> | No zoster vaccine dose received | Received                                 | Not received |
| Age on 1 March 2020                           |                                               |                                 |                                          |              |
| 65-69 years                                   | 20.0 (27.9)                                   | 31.1 (26.9)                     | 23.3 (27.7)                              | 36.3 (30.7)  |
| 70-74 years                                   | 30.6 (28.4)                                   | 28.2 (28.9)                     | 29.4 (29.0)                              | 28.8 (28.6)  |
| 75-79 years                                   | 22.3 (18.9)                                   | 17.3 (19.3)                     | 20.5 (19.0)                              | 16.3 (18.2)  |
| 80-84 years                                   | 14.6 (12.7)                                   | 11.6 (12.8)                     | 13.9 (12.5)                              | 9.5 (11.6)   |
| 85-89 years                                   | 8.4 (7.7)                                     | 7.2 (7.7)                       | 8.4 (7.4)                                | 5.5 (7.0)    |
| ≥90 years                                     | 4.0 (4.4)                                     | 4.6 (4.4)                       | 4.5 (4.2)                                | 3.7 (3.9)    |
| Sex                                           |                                               |                                 |                                          |              |
| Female                                        | 58.0 (55.6)                                   | 53.4 (55.4)                     | 55.2 (55.5)                              | 56.1 (56.1)  |
| Male                                          | 42.0 (44.4)                                   | 46.6 (44.6)                     | 44.8 (44.5)                              | 43.9 (43.9)  |
| Race and ethnicity                            |                                               |                                 |                                          |              |
| White, non-Hispanic                           | 57.6 (48.5)                                   | 42.0 (48.7)                     | 50.2 (49.0)                              | 44.2 (48.4)  |
| Black, non-Hispanic                           | 7.1 (9.4)                                     | 11.2 (9.4)                      | 8.1 (9.2)                                | 13.6 (9.3)   |
| Asian/Pacific Islander, non-Hispanic          | 13.4 (11.9)                                   | 10.6 (11.9)                     | 12.6 (11.9)                              | 9.1 (12.1)   |
| Hispanic (any race)                           | 19.9 (27.3)                                   | 31.5 (26.5)                     | 26.6 (26.4)                              | 25.8 (26.6)  |
| Other, mixed, or unknown race                 | 2.1 (2.9)                                     | 4.7 (3.5)                       | 2.4 (3.4)                                | 7.3 (3.7)    |
| Tobacco smoking                               |                                               |                                 |                                          |              |
| Current smoker                                | 2.3 (3.1)                                     | 3.9 (3.2)                       | 2.9 (3.2)                                | 4.2 (3.3)    |
| Former smoker                                 | 35.3 (32.6)                                   | 30.1 (32.4)                     | 35.2 (31.8)                              | 23.1 (31.3)  |
| Never smoker                                  | 58.7 (57.1)                                   | 54.5 (56.3)                     | 58.7 (55.7)                              | 48.1 (56.9)  |
| Unknown                                       | 3.7 (7.3)                                     | 11.4 (8.0)                      | 3.2 (9.3)                                | 24.5 (8.5)   |
| Body mass index                               |                                               |                                 |                                          |              |
| <18.5 (underweight)                           | 1.8 (1.8)                                     | 1.8 (1.8)                       | 1.8 (1.7)                                | 1.7 (1.7)    |
| 18.5-24.9 (normal weight)                     | 31.0 (27.4)                                   | 24.8 (27.3)                     | 29.1 (27.0)                              | 21.9 (27.0)  |
| 25.0-29.9 (overweight)                        | 36.3 (34.5)                                   | 32.7 (34.3)                     | 36.5 (33.7)                              | 26.8 (34.0)  |
| 30.0-39.9 (obese)                             | 23.9 (24.7)                                   | 24.5 (24.4)                     | 25.7 (23.9)                              | 19.3 (24.2)  |
| ≥40.0 (morbidly obese)                        | 2.7 (3.1)                                     | 3.1 (3.0)                       | 3.1 (2.9)                                | 2.6 (3.1)    |
| Unknown                                       | 4.4 (8.5)                                     | 13.1 (9.3)                      | 3.8 (10.8)                               | 27.6 (9.9)   |
| Comorbid conditions                           |                                               |                                 |                                          |              |
| Myocardial infarction                         | 4.5 (4.6)                                     | 4.6 (4.6)                       | 5.0 (4.4)                                | 2.9 (4.2)    |
| Congestive heart failure                      | 7.1 (7.1)                                     | 7.1 (7.1)                       | 8.0 (6.9)                                | 3.9 (6.4)    |
| Peripheral vascular disease                   | 41.2 (36.2)                                   | 32.4 (36.2)                     | 40.7 (35.4)                              | 21.4 (33.8)  |
| Cerebrovascular disease                       | 6.6 (6.3)                                     | 6.0 (6.3)                       | 6.9 (6.1)                                | 4.0 (6.0)    |
| Hypertension                                  | 62.9 (60.7)                                   | 58.1 (60.2)                     | 65.1 (59.1)                              | 43.6 (58.4)  |
| Hyperlipidemia                                | 72.0 (66.0)                                   | 60.6 (65.5)                     | 71.2 (64.4)                              | 46.6 (63.9)  |
| Diabetes                                      | 24.9 (25.8)                                   | 26.7 (25.9)                     | 28.2 (25.3)                              | 18.0 (24.6)  |
| Chronic obstructive pulmonary disease         | 17.9 (16.3)                                   | 14.9 (16.2)                     | 18.3 (15.9)                              | 9.1 (15.3)   |
| Renal disease                                 | 19.7 (18.3)                                   | 17.1 (18.2)                     | 20.5 (17.7)                              | 10.6 (16.9)  |
| Moderate or severe liver disease              | 0.3 (0.3)                                     | 0.4 (0.3)                       | 0.4 (0.3)                                | 0.2 (0.3)    |
| Malignancy                                    | 5.9 (5.5)                                     | 5.2 (5.5)                       | 6.2 (5.4)                                | 3.2 (5.2)    |
| Metastatic solid tumor                        | 1.7 (1.7)                                     | 1.7 (1.7)                       | 1.9 (1.6)                                | 1.0 (1.5)    |
| Asthma                                        | 10.3 (9.1)                                    | 8.2 (9.1)                       | 10.3 (8.9)                               | 5.1 (8.6)    |
| Obstructive sleep apnea                       | 7.9 (6.4)                                     | 5.1 (6.4)                       | 7.3 (6.2)                                | 3.0 (6.2)    |
| HIV/AIDS                                      | <0.1 (<0.1)                                   | <0.1 (<0.1)                     | <0.1 (<0.1)                              | <0.1 (<0.1)  |
| Organ transplant                              | 0.1 (0.1)                                     | 0.1 (0.1)                       | 0.1 (0.1)                                | <0.1 (0.1)   |
| Other immunocompromising condition            | 4.8 (4.5)                                     | 4.3 (4.5)                       | 5.0 (4.4)                                | 2.7 (4.3)    |
| Hypothyroidism                                | 15.6 (13.7)                                   | 12.0 (13.6)                     | 14.9 (13.4)                              | 9.2 (13.3)   |
| Rheumatologic/inflammatory condition          | 2.4 (2.4)                                     | 2.4 (2.4)                       | 2.6 (2.3)                                | 1.4 (2.3)    |
| Depression                                    | 15.2 (13.5)                                   | 11.9 (13.4)                     | 15.0 (13.1)                              | 7.8 (12.9)   |
| Zoster vaccination                            |                                               |                                 |                                          |              |
| Any zoster vaccine dose received <sup>1</sup> | 100.0 (100.0)                                 | 0.0 (0.0)                       | 51.2 (43.6)                              | 19.5 (44.2)  |
| Influenza vaccination                         |                                               |                                 |                                          |              |
| Vaccinated in 2019-20 season                  | 89.9 (78.4)                                   | 67.4 (77.3)                     | 100.0 (100.0)                            | 0.0 (0.0)    |
| Pneumococcal vaccination                      |                                               |                                 |                                          |              |

|                                        |                                                        |             |             |             |             |
|----------------------------------------|--------------------------------------------------------|-------------|-------------|-------------|-------------|
|                                        | Both PCV13 and PPSV23 per ACIP guidelines <sup>2</sup> | 90.2 (76.4) | 65.2 (75.6) | 87.1 (74.5) | 39.2 (75.0) |
|                                        | PCV13 only                                             | 6.2 (9.2)   | 11.8 (9.2)  | 9.7 (9.2)   | 11.5 (9.5)  |
|                                        | PPSV23 only                                            | 1.3 (2.7)   | 3.6 (2.6)   | 1.1 (2.8)   | 7.5 (2.6)   |
|                                        | No pneumococcal vaccine                                | 2.9 (11.7)  | 20.4 (12.6) | 4.0 (13.5)  | 42.4 (12.9) |
| Prior year outpatient visits           |                                                        |             |             |             |             |
|                                        | 0-9                                                    | 19.6 (26.4) | 32.1 (26.8) | 19.8 (28.2) | 49.9 (29.0) |
|                                        | 10-19                                                  | 30.4 (29.8) | 28.7 (29.5) | 30.4 (28.9) | 26.3 (30.0) |
|                                        | 20-29                                                  | 20.4 (18.4) | 17.0 (18.4) | 20.4 (18.0) | 12.1 (17.7) |
|                                        | 30-39                                                  | 12.0 (10.5) | 9.4 (10.5)  | 12.0 (10.3) | 5.6 (9.8)   |
|                                        | ≥40                                                    | 17.6 (14.9) | 12.8 (14.8) | 17.5 (14.6) | 6.1 (13.5)  |
| Prior year inpatient visits            |                                                        |             |             |             |             |
|                                        | 0                                                      | 92.2 (92.1) | 92.0 (92.1) | 91.1 (92.3) | 95.5 (92.6) |
|                                        | 1                                                      | 6.1 (6.1)   | 6.1 (6.1)   | 6.8 (6.0)   | 3.7 (5.7)   |
|                                        | 2                                                      | 1.2 (1.2)   | 1.3 (1.2)   | 1.4 (1.2)   | 0.6 (1.2)   |
|                                        | ≥3                                                     | 0.5 (0.6)   | 0.6 (0.6)   | 0.7 (0.6)   | 0.2 (0.5)   |
| Prior year emergency department visits |                                                        |             |             |             |             |
|                                        | 0                                                      | 76.8 (76.7) | 76.9 (76.8) | 74.7 (77.2) | 84.2 (77.9) |
|                                        | 1                                                      | 15.0 (14.9) | 14.6 (14.8) | 15.9 (14.5) | 11.0 (14.2) |
|                                        | 2                                                      | 4.7 (4.7)   | 4.7 (4.7)   | 5.2 (4.6)   | 2.9 (4.4)   |
|                                        | ≥3                                                     | 3.6 (3.8)   | 3.8 (3.7)   | 4.3 (3.6)   | 1.8 (3.4)   |
| Census tract median household income   |                                                        |             |             |             |             |
|                                        | \$0-\$29,999                                           | 0.9 (1.3)   | 1.5 (1.2)   | 1.1 (1.3)   | 1.6 (1.2)   |
|                                        | \$30,000-\$49,999                                      | 11.7 (15.3) | 17.7 (15.1) | 14.4 (14.9) | 17.3 (14.9) |
|                                        | \$50,000-\$69,999                                      | 19.6 (22.5) | 24.6 (22.4) | 22.0 (22.3) | 23.6 (22.2) |
|                                        | \$70,000-\$89,999                                      | 23.3 (23.2) | 23.4 (23.3) | 23.5 (23.3) | 22.8 (23.2) |
|                                        | \$90,000-\$109,999                                     | 19.0 (17.0) | 15.8 (17.1) | 17.4 (17.2) | 16.3 (17.3) |
|                                        | \$110,000-\$129,999                                    | 13.8 (11.5) | 9.7 (11.5)  | 11.9 (11.6) | 10.1 (11.6) |
|                                        | ≥\$130,000                                             | 11.7 (9.0)  | 7.1 (9.1)   | 9.5 (9.2)   | 7.9 (9.4)   |
|                                        | Unknown                                                | 0.1 (0.2)   | 0.2 (0.2)   | 0.1 (0.2)   | 0.4 (0.2)   |

ACIP: Advisory Committee on Immunization Practices; PCV13: 13-valent pneumococcal conjugate vaccine; PPSV23: 23-valent pneumococcal polysaccharide vaccine.

Values in the table show the proportion of individuals within each exposure group who exhibit the indicated factor, before and after IPW weighting.

<sup>1</sup>Receipt of ≥1 dose of live or recombinant zoster vaccine.

<sup>2</sup>Receipt of PCV13 ≥1 year before PPSV23 for immunocompetent individuals, or ≥8 weeks before PPSV23 for immunocompromised individuals, or (for individuals who had previously received PPSV23) receipt of PCV13 ≥1 year after the most recent PPSV23 dose.

**Table S8: Estimated effectiveness of zoster vaccines and 2019-2020 seasonal influenza vaccines against COVID-19 outcomes after inverse propensity weighting for these exposures.**

| Vaccine                              | Effect measure                 | Endpoint                            |                                       |                                             |
|--------------------------------------|--------------------------------|-------------------------------------|---------------------------------------|---------------------------------------------|
|                                      |                                | Any COVID-19 diagnosis <sup>1</sup> | COVID-19 hospitalization <sup>1</sup> | Fatal COVID-19 hospitalization <sup>1</sup> |
| Any zoster vaccine dose <sup>2</sup> | Adjusted hazard ratio (95% CI) | 0.82 (0.74, 0.90)                   | 0.71 (0.59, 0.86)                     | 0.70 (0.49, 0.99)                           |
| 2019-2020 seasonal influenza vaccine | Adjusted hazard ratio (95% CI) | 1.04 (0.95, 1.15)                   | 1.11 (0.92, 1.33)                     | 0.93 (0.67, 1.29)                           |

We obtain estimates presented in the table via Cox proportional hazards models; adjusted estimates are obtained from doubly robust inverse propensity weighted models that include covariates presented in **Table 1**. We indicate the distribution of each covariate in association with zoster and influenza vaccine receipt in **Table S7**.

<sup>1</sup>We define any COVID-19 diagnosis as a positive result of a molecular test for SARS-CoV-2 infection or a clinically confirmed COVID-19 diagnosis, COVID-19 hospitalization as a new inpatient admission (excluding observational admissions lasting <24 hours) between 7 days before and 28 days after a COVID-19 diagnosis, and fatal COVID-19 hospitalization as death ≤60 days following admission.

<sup>2</sup>Receipt of ≥1 dose of live or recombinant zoster vaccine.
